# Supplementary material
Source: HighWire-hosted journal article supplement (https://erj.ersjournals.com/content/57/1/1901949)
Supplement: inline-supplementary-material-2 [file inline-supplementary-material-2.pdf]

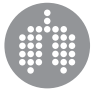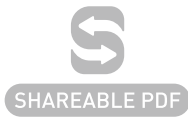

# NADPH oxidase DUOX1 sustains TGF- $\beta$ 1 signalling and promotes lung fibrosis

Ruy Andrade Louzada<sup>1</sup>, Raphaël Corre<sup>1</sup>, Rabii Ameziane El Hassani<sup>2</sup>,  
Lydia Meziani<sup>3</sup>, Madeleine Jaillet<sup>4</sup>, Aurélie Cazes<sup>5</sup>, Bruno Crestani<sup>4,6,7</sup>,  
Eric Deutsch<sup>3</sup>  and Corinne Dupuy<sup>1</sup>

**Affiliations:** <sup>1</sup>CNRS UMR 8200, Université Paris-Saclay, Gustave Roussy, Villejuif, France. <sup>2</sup>Laboratoire de Biologie des Pathologies Humaines, Université Mohammed V, Faculté des Sciences, Rabat, Morocco. <sup>3</sup>Inserm U1030, Université Paris-Saclay, Gustave Roussy, Villejuif, France. <sup>4</sup>INSERM U1152, Paris, France. <sup>5</sup>Département de Pathologie, Hôpital Bichat, Paris, France. <sup>6</sup>Université Paris-Diderot, LABEX INFLAMEX, Paris, France. <sup>7</sup>Assistance Publique-Hôpitaux de Paris, DHU FIRE, Hôpital Bichat, Paris, France.

**Correspondence:** Corinne Dupuy, Gustave Roussy, UMR 8200 CNRS, 114 rue Edouard Vaillant; 94805 Villejuif, France. E-mail: corinne.dupuy@gustaveroussy.fr

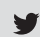

@ERSpublications

**The data reveal a new function for DUOX1-derived H<sub>2</sub>O<sub>2</sub> as a signalling amplifier of the TGF- $\beta$ 1 pathway that causes a chronic long-term fibroblast activation, contributing thus to unrestrained and progressive fibrosis** <https://bit.ly/39HeEpu>

**Cite this article as:** Louzada RA, Corre R, Ameziane El Hassani R, *et al.* NADPH oxidase DUOX1 sustains TGF- $\beta$ 1 signalling and promotes lung fibrosis. *Eur Respir J* 2021; 57: 1901949 [https://doi.org/10.1183/13993003.01949-2019].

This single-page version can be shared freely online.

**ABSTRACT** Interstitial lung fibroblast activation coupled with extracellular matrix production is a pathological signature of pulmonary fibrosis, and is governed by transforming growth factor (TGF)- $\beta$ 1/Smad signalling. TGF- $\beta$ 1 and oxidative stress cooperate to drive fibrosis. Cells can produce reactive oxygen species through activation and/or induction of NADPH oxidases, such as dual oxidase (DUOX1/2). Since DUOX enzymes, as extracellular hydrogen peroxide (H<sub>2</sub>O<sub>2</sub>)-generating systems, are involved in extracellular matrix formation and in wound healing in different experimental models, we hypothesised that DUOX-based NADPH oxidase plays a role in the pathophysiology of pulmonary fibrosis.

Our *in vivo* data (idiopathic pulmonary fibrosis patients and mouse models of lung fibrosis) showed that the NADPH oxidase DUOX1 is induced in response to lung injury. DUOX1-deficient mice (DUOX1<sup>+/-</sup> and DUOX1<sup>-/-</sup>) had an attenuated fibrotic phenotype. In addition to being highly expressed at the epithelial surface of airways, DUOX1 appears to be well expressed in the fibroblastic foci of remodelled lungs. By using primary human and mouse lung fibroblasts, we showed that TGF- $\beta$ 1 upregulates DUOX1 and its maturation factor DUOXA1 and that DUOX1-derived H<sub>2</sub>O<sub>2</sub> promoted the duration of TGF- $\beta$ 1-activated Smad3 phosphorylation by preventing phospho-Smad3 degradation. Analysis of the mechanism revealed that DUOX1 inhibited the interaction between phospho-Smad3 and the ubiquitin ligase NEDD4L, preventing NEDD4L-mediated ubiquitination of phospho-Smad3 and its targeting for degradation.

These findings highlight a role for DUOX1-derived H<sub>2</sub>O<sub>2</sub> in a positive feedback that amplifies the signalling output of the TGF- $\beta$ 1 pathway and identify DUOX1 as a new therapeutic target in pulmonary fibrosis.
